# Supplementary material for: Human Adipose-Derived Stem Cells Combined with Nano-Hydrogel Promote Functional Recovery after Spinal Cord Injury in Rats
Source: MDPI journal article supplement (doi:10.3390/biology11050781), 2022-05-20
Supplement: s1 [file s1]

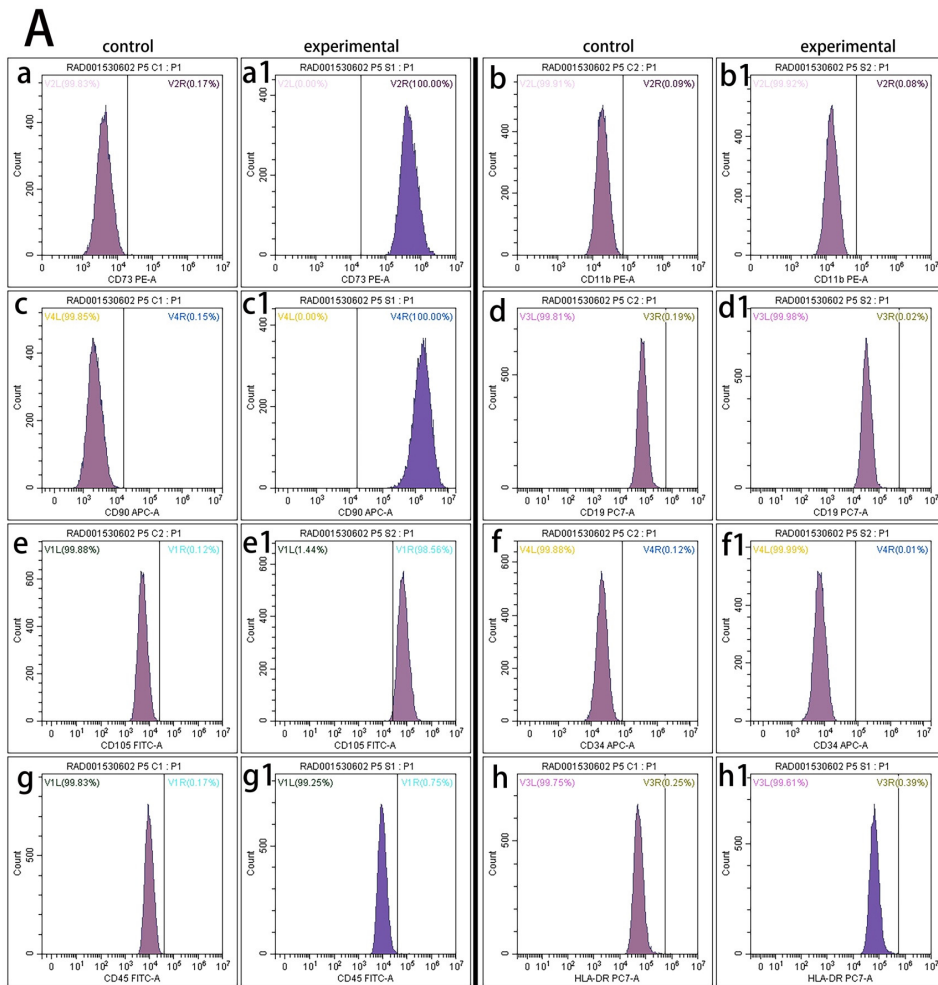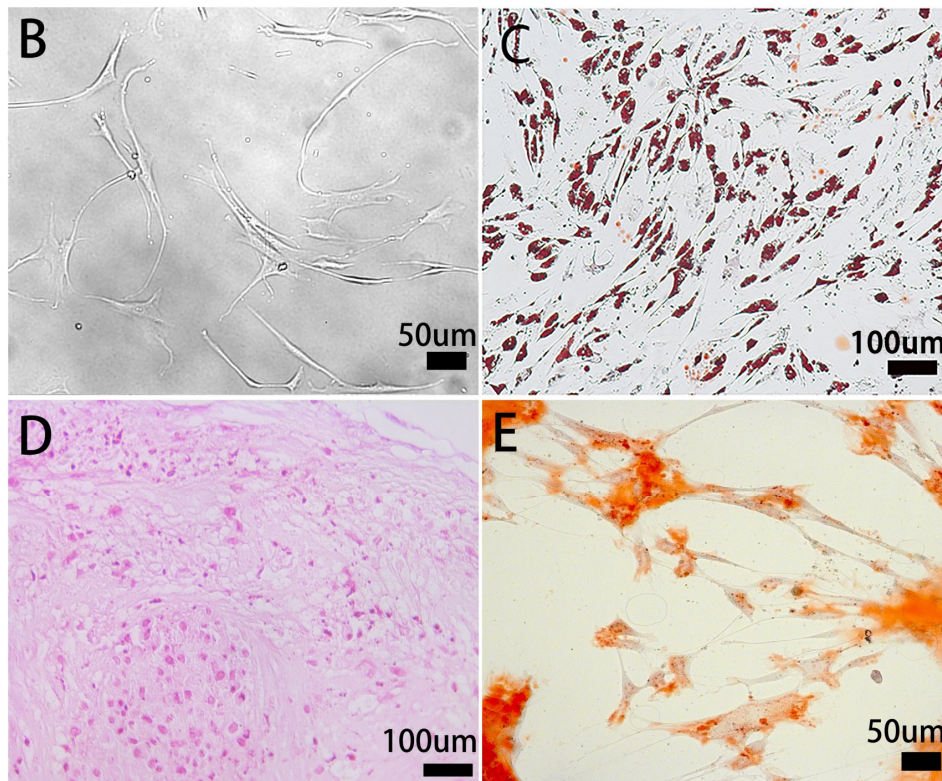

**Figure S1. ADSCs identification.** **A:** The fifth-generation ADSCs flow cytometry analysis showed that the expression rates of mesenchymal stem cell positive markers CD73 (a, a1), CD90 (c, c1), and CD105 (e, e1) exceeded 95%, and the expression rates of cell negative markers CD11b (b, b1), CD19 (d, d1), CD34 (f, f1), CD45 (g, g1), and HLA-DR (h, h1) were less than 2%, indicating high cell purity. **B:** The shape of the fifth-generation of ADSCs was observed. They had long fusiform cell bodies with elongated processes on the surface. **C:** Adipose stem cells induce differentiation into adipocytes (Oil Red O). **D:** Adipose stem cells induce differentiation into cartilage (Safranin O). **E:** Osteogenic differentiation of adipose stem cells (Alizarin Red). B-E showed that transplanted cells could differentiate into adipocytes, chondrocytes, and osteocytes, which were consistent with the differentiation potential of ADSCs. B, E scale bars=50  $\mu$ m, C, D scale bars=100  $\mu$ m. ADSCs: Adipose stem cells.

**Table S1.** Sample size of rats in this experiment.

| Groups                                                    | AD-SCs+RADA16-RGD                                                         | ADSCs                                                                     | RADA16-RGD                                                                | PBS                                                                       |
|-----------------------------------------------------------|---------------------------------------------------------------------------|---------------------------------------------------------------------------|---------------------------------------------------------------------------|---------------------------------------------------------------------------|
| Survival of transplanted cells                            | $n = 12$<br>(1W: $n = 3$ , 2W: $n = 3$ , 3W: $n = 3$ , 4W: $n = 3$ )      | $n = 12$<br>(1W: $n = 3$ , 2W: $n = 3$ , 3W: $n = 3$ , 4W: $n = 3$ )      |                                                                           |                                                                           |
| IHC: $n = 12$<br>(BBB score: $n = 8$ , and MEP: $n = 4$ ) | $n = 12$<br>(Chat, NeuN, MBP: $n = 6$ , NF-200: $n = 3$ , 5-HT: $n = 3$ ) | $n = 12$<br>(Chat, NeuN, MBP: $n = 6$ , NF-200: $n = 3$ , 5-HT: $n = 3$ ) | $n = 12$<br>(Chat, NeuN, MBP: $n = 6$ , NF-200: $n = 3$ , 5-HT: $n = 3$ ) | $n = 12$<br>(Chat, NeuN, MBP: $n = 6$ , NF-200: $n = 3$ , 5-HT: $n = 3$ ) |
| Iba1 (Additional experiments)                             | $n = 4$                                                                   | $n = 4$                                                                   | $n = 4$                                                                   | $n = 4$                                                                   |
| Elisa                                                     | $n = 3$                                                                   | $n = 3$                                                                   | $n = 3$                                                                   | $n = 3$                                                                   |
| LC-MS                                                     | $n = 3$                                                                   |                                                                           |                                                                           | $n = 4$                                                                   |
| WB                                                        | $n = 3$                                                                   | $n = 3$                                                                   | $n = 3$                                                                   | $n = 3$                                                                   |
| Total                                                     | $n = 37$                                                                  | $n = 34$                                                                  | $n = 22$                                                                  | $n = 26$                                                                  |

Table S2. Differentially expressed proteins.

| Protein | Spine_CR | Spine_CR | Spine_C<br>R | Spine_P<br>B | Spine_P<br>B | Spine_P<br>B | Spine_P<br>B | ratio    | t.test_p | regu-<br>lated | ProteinG | Descript | Gene<br>Name |
|---------|----------|----------|--------------|--------------|--------------|--------------|--------------|----------|----------|----------------|----------|----------|--------------|
| A1L1K3  | 135991.4 | 92439.41 | 140162       | 49783.64     | 59091.57     | 70259.97     | 74145.32     | 1.940367 | 0.017623 | up             | A1L1K3   | Anaphase | Anapc<br>5   |
| A6JFQ6  | 29468.32 | 7001.709 | 15066.58     | 482.1649     | 495.3949     | 3675.246     | 627.2869     | 13.01407 | 0.006915 | up             | A6JFQ6   | Clavesin | Clvs1        |
| A8IHN8  | 44628.94 | 22507.18 | 30720.49     | 13123.52     | 6330.119     | 4349.643     | 13764.37     | 3.47308  | 0.012828 | up             | A8IHN8   | Uncharac | Ag2          |
| D3ZCL3  | 16765.17 | 4557.034 | 16571.18     | 482.1649     | 495.3949     | 427.0003     | 627.2869     | 24.8663  | 0.016623 | up             | D3ZCL3   | U1 small | Snrpc        |
| F2Z3T4  | 19146.59 | 8733.67  | 12788.2      | 5463.348     | 5278.116     | 4329.99      | 7540.828     | 2.398016 | 0.044405 | up             | F2Z3T4   | Musclebl | Mbnl2        |
| I6L9G5  | 5546.073 | 3875.812 | 2604.873     | 482.1649     | 2008.06      | 1496.827     | 1976.696     | 2.688859 | 0.045747 | up             | I6L9G5   | Reticulo | Rcn3         |
| O35162  | 58280.23 | 24032.27 | 34479.1      | 12745.63     | 17165.98     | 9994.994     | 18279.85     | 2.676261 | 0.044492 | up             | O35162   | Heat sho | Hspa1<br>3   |
| P00697  | 71629.73 | 37061.13 | 95105.11     | 13355.8      | 21239.38     | 10034.61     | 48517.13     | 2.917198 | 0.043873 | up             | P00697   | Lysozyme | Lyz1         |
| P07150  | 106962.7 | 65873.28 | 90720.25     | 54862.24     | 46836.92     | 35409.22     | 38592.25     | 2.00004  | 0.018253 | up             | P07150   | Annexin  | Anxa1        |
| P0C0A1  | 40537.67 | 21251.03 | 40560.63     | 9998.23      | 16480.07     | 17393.15     | 18614.88     | 2.18393  | 0.046104 | up             | P0C0A1   | Vacuolar | Vps25        |
| P10687  | 27622.67 | 13924.62 | 19959.01     | 6377.44      | 8421.779     | 8714.209     | 10994.48     | 2.376511 | 0.02933  | up             | P10687   | 1-phosph | Plcb1        |
| P21263  | 12259.22 | 2772.578 | 7864.301     | 1781.64      | 495.3949     | 427.0003     | 3373.484     | 5.023123 | 0.04295  | up             | P21263   | Nestin O | Nes          |
| P25886  | 28636.76 | 12475.24 | 24918.75     | 6209.79      | 8254.675     | 5059.509     | 14986.79     | 2.551117 | 0.043206 | up             | P25886   | 60S ribo | Rpl29        |
| P29067  | 16784.9  | 11221.06 | 18234.55     | 482.1649     | 6205.827     | 427.0003     | 627.2869     | 7.963288 | 0.019137 | up             | P29067   | Beta-arr | Arrb2        |
| P31721  | 82565.71 | 38834.77 | 49534.78     | 21538.38     | 21315.88     | 10301.43     | 25950.42     | 2.881114 | 0.019339 | up             | P31721   | Compleme | C1qb         |
| P43527  | 11962.46 | 5030.025 | 7498.847     | 700.7345     | 495.3949     | 427.0003     | 627.2869     | 14.5107  | 0.003146 | up             | P43527   | Caspase- | Casp1        |
| P52925  | 28622.38 | 20317.72 | 24093.61     | 11602.87     | 17624.33     | 10880.49     | 19832.61     | 1.624588 | 0.037907 | up             | P52925   | High mob | Hmgb<br>2    |
| P53676  | 76374.44 | 11329.86 | 11389.22     | 482.1649     | 6665.519     | 427.0003     | 3760.997     | 11.65565 | 0.038353 | up             | P53676   | AP-3 com | Ap3m<br>1    |
| P53678  | 38958.14 | 22636.22 | 21236.26     | 16292.77     | 9774.99      | 11363.83     | 13536.36     | 2.166868 | 0.037073 | up             | P53678   | AP-3 com | Ap3m<br>2    |
| P55009  | 40269.29 | 19040.01 | 49323.45     | 15760.83     | 9004.182     | 5205.61      | 8878.083     | 3.728403 | 0.021661 | up             | P55009   | Allograf | Aif1         |
| P61149  | 26987.73 | 20313.71 | 35639.79     | 11827.54     | 11521.43     | 12095.04     | 14361.88     | 2.220386 | 0.03189  | up             | P61149   | Fibrobla | Fgf1         |
| P62268  | 52373.19 | 26461.93 | 38825.78     | 10879.67     | 13385.1      | 20621.35     | 25508.82     | 2.228586 | 0.033668 | up             | P62268   | 40S ribo | Rps23        |
| P62634  | 32957.89 | 15676.14 | 38794.39     | 7887.914     | 10608.63     | 7682.85      | 2861.571     | 4.014027 | 0.017035 | up             | P62634   | Cellular | Cnbp         |
| P63055  | 158650.7 | 77006.31 | 179957.7     | 76106.38     | 44549.22     | 32777.82     | 49760.24     | 2.727216 | 0.040377 | up             | P63055   | Calmodul | Pcp4         |
| P63090  | 15115.84 | 10451.53 | 15395.6      | 1982.443     | 2281.363     | 1864.246     | 2342.967     | 6.447547 | 0.001329 | up             | P63090   | Pleiotro | Ptn          |

|        |          |          |          |          |          |          |          |          |          |      |        |          |              |
|--------|----------|----------|----------|----------|----------|----------|----------|----------|----------|------|--------|----------|--------------|
| P63255 | 13210.83 | 24048.23 | 76798.18 | 482.1649 | 495.3949 | 4413.16  | 627.2869 | 25.27022 | 0.005869 | up   | P63255 | Cysteine | Crip1        |
| P84817 | 350387.1 | 187216.9 | 306172.9 | 122481.2 | 122881.5 | 91106.88 | 150344.6 | 2.311017 | 0.029535 | up   | P84817 | Mitochon | Fis1         |
| P97576 | 17860.01 | 16802.59 | 17176.43 | 6226.554 | 7533.024 | 7023.718 | 7895.626 | 2.410087 | 0.000149 | up   | P97576 | GrpE pro | Grpel1       |
| P97675 | 38504.7  | 17278.65 | 12728.37 | 482.1649 | 495.3949 | 427.0003 | 627.2869 | 44.95858 | 0.00552  | up   | P97675 | Ectonucl | Enpp3        |
| Q09167 | 51549.31 | 29803.89 | 62305.52 | 13842.25 | 495.3949 | 427.0003 | 627.2869 | 12.4445  | 0.017973 | up   | Q09167 | Serine/a | Srsf5        |
| Q498U4 | 36955.12 | 18615.96 | 28932.48 | 11628.22 | 10932.73 | 8076.49  | 6254.093 | 3.054127 | 0.011603 | up   | Q498U4 | SAP doma | Sarnp        |
| Q4KLH4 | 65837.23 | 33142.56 | 38940.57 | 13641.58 | 15177.26 | 14310.71 | 31143.33 | 2.475921 | 0.024985 | up   | Q4KLH4 | Paraspec | Pspc1        |
| Q4CLK9 | 14277.07 | 5438.278 | 14911.18 | 6497.844 | 495.3949 | 427.0003 | 627.2869 | 5.737007 | 0.026154 | up   | Q4CLK9 | RNA poly | Ssu72        |
| Q4V7F2 | 39945    | 23904.4  | 25115.59 | 13651.89 | 10743.89 | 7824.226 | 17601.71 | 2.380889 | 0.014366 | up   | Q4V7F2 | Cysteine | Creld1       |
| Q5BK62 | 772.6278 | 466.7632 | 653.366  | 1735.385 | 1012.502 | 1476.121 | 2432.458 | 0.379132 | 0.010172 | down | Q5BK62 | Protein  | Mpv17        |
| Q63663 | 52909.4  | 18491.44 | 35680.04 | 7402.287 | 7277.684 | 4805.169 | 11278.32 | 4.641043 | 0.020291 | up   | Q63663 | Guanylat | Gbp2         |
| Q63691 | 24168.86 | 4449.944 | 15578.4  | 9232.824 | 495.3949 | 427.0003 | 627.2869 | 5.465299 | 0.042194 | up   | Q63691 | Monocyte | Cd14         |
| Q6AYZ1 | 675104.6 | 551522.7 | 1282772  | 120451.7 | 173817.7 | 143303.3 | 194669   | 5.292068 | 0.013214 | up   | Q6AYZ1 | Tubulin  | Tu-<br>ba1c  |
| Q6MG08 | 13573.85 | 9886.047 | 11999.16 | 7506.565 | 5847.306 | 6758.415 | 8680.214 | 1.642051 | 0.012336 | up   | Q6MG08 | ATP-bind | Abcf1        |
| Q80T18 | 51111.64 | 14495.84 | 18959.55 | 6435.278 | 4238.378 | 2385.85  | 627.2869 | 8.238309 | 0.016552 | up   | Q80T18 | Glia mat | Gmfg         |
| Q811M5 | 21341.25 | 11071.95 | 26620.71 | 482.1649 | 6368.159 | 427.0003 | 627.2869 | 9.957717 | 0.013167 | up   | Q811M5 | Compleme | C6           |
| Q923V8 | 23120.96 | 9990.439 | 23089.3  | 6285.189 | 5367.668 | 5070.832 | 8464.774 | 2.974944 | 0.048746 | up   | Q923V8 | Selenopr | Sele-<br>nof |
| Q9ES54 | 27388.6  | 19595.65 | 18762.68 | 10138.8  | 14435.43 | 8243.766 | 14967.16 | 1.834515 | 0.020802 | up   | Q9ES54 | Nuclear  | Nploc<br>4   |
| Q9QY44 | 15885.14 | 6390.143 | 22121.84 | 6505.077 | 495.3949 | 4092.126 | 627.2869 | 5.050915 | 0.045807 | up   | Q9QY44 | ATP-bind | Abcd2        |
| Q9QYU2 | 35484    | 20682.23 | 31074.28 | 16648.87 | 12839.67 | 13016.38 | 21286.11 | 1.823465 | 0.041716 | up   | Q9QYU2 | Elongati | Tsfm         |
| Q9WTT2 | 18580.62 | 20564.74 | 15929.4  | 14658.67 | 13551.06 | 7829.308 | 11790.21 | 1.535316 | 0.041433 | up   | Q9WTT2 | Caseinol | Clpb         |
| Q9Z1M9 | 8267.983 | 3646.136 | 6814.98  | 4188.469 | 2005.565 | 1533.165 | 1475.354 | 2.713609 | 0.03188  | up   | Q9Z1M9 | Structur | Smc1a        |
